# Supplementary material for: The fine structure of the cyst wall of the metacercaria of Fasciola hepática
Source: Oxford University Press journal article supplement (doi:10.1242/jcs.s3-105.72.385), 1964-12-01
Supplement: 385-s.pdf [file 385-s.pdf]

## ERRATUM

It is regretted that the plates accompanying the two papers by Dr. A. H. Baillie in the June 1964 number of the Journal were bound in the wrong positions. The plate that should have accompanied the first paper was bound with the second and conversely.
